# Supplementary material
Source: PubMed Central journal article supplement (PMC6151150)
Supplement: NIHMS973249-supplement-S1.pdf [file NIHMS973249-supplement-S1.pdf]

Supplemental Information  
Supplemental Figures

Supplemental Figure S1. Additional binding experiments.

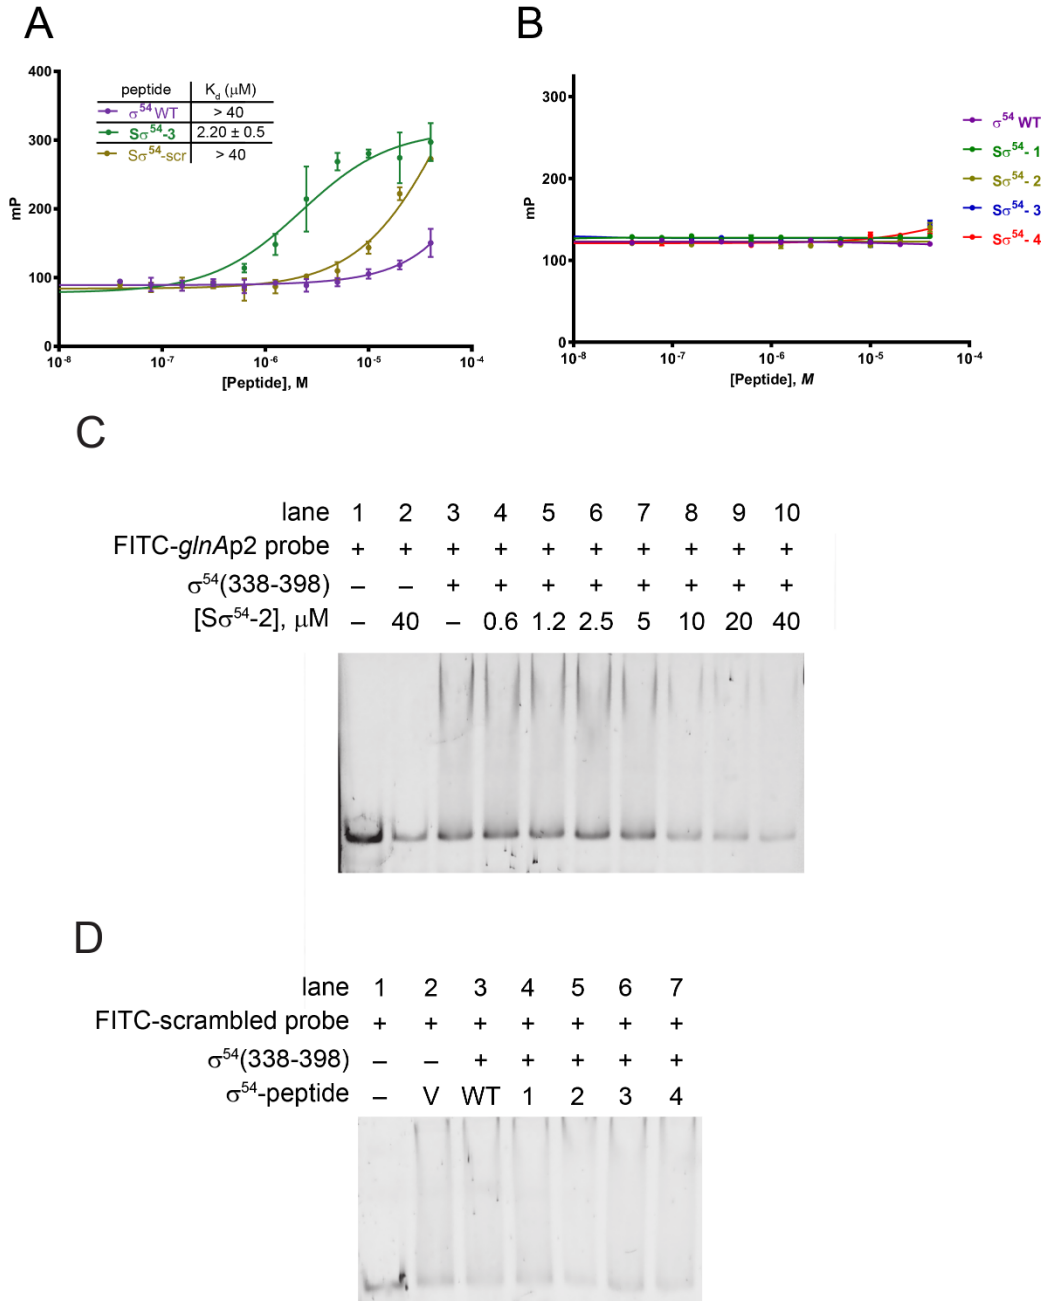

**Supplemental Figure S1, related to Figure 2A. (A)** Binding of scrambled peptide to *glnAp2* DNA. Fluorescence polarization curves and accompanying dissociation constants of  $S\sigma^{54}$  scrambled with FITC *glnAp2* 30mer. **(B)** Binding of  $S\sigma^{54}$  peptides to scrambled *glnAp2* DNA. **(C)** EMSA showing dose-responsive binding of  $S\sigma^{54}$ -2 to *glnAp2* DNA with displacement of  $\sigma^{54}$ (338-398). **(D)** EMSA showing lack of  $S\sigma^{54}$  peptide binding to scrambled FITC-*glnAp2* DNA.

**Supplemental Figure S2. Growth conditions and effects of nitrogen depletion and peptide treatment on *E. coli*.**

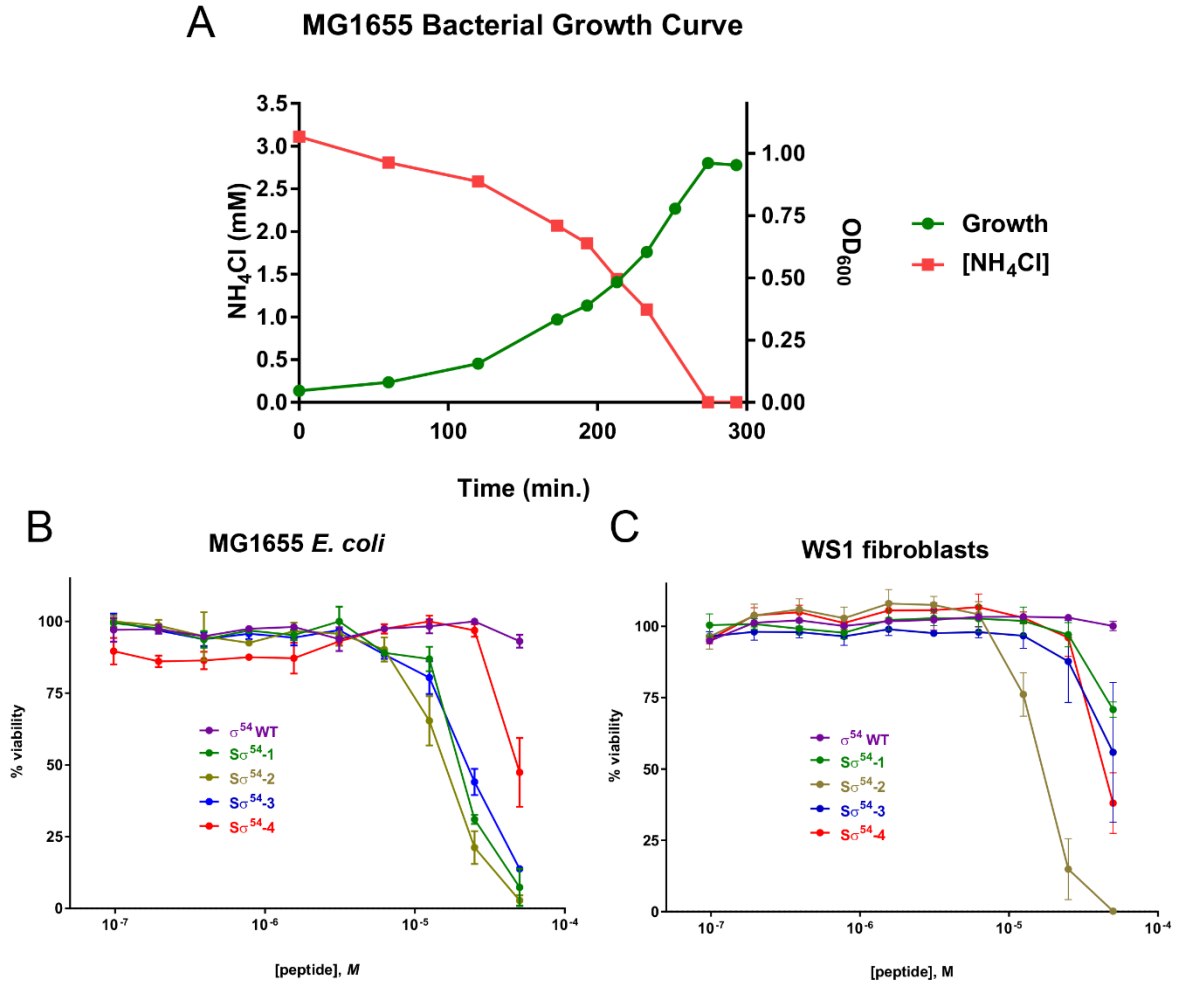

**Supplemental Figure S2, related to Figure 4 and STAR Methods. (A)** Gradual depletion of nitrogen in Gutnick minimal media. Quantification of ammonia concentration during growth of MG1655 *E. coli* in Gutnick minimal media with 3 mM NH<sub>4</sub>Cl. **(B)** Viability of WS1 fibroblasts after 24 h treatment in Opti-MEM. **(C)** Viability of MG1655 *E. coli* after 1 h treatment in LB media.

**Supplemental Figure S3. Confocal microscopy of WS1 human fibroblasts exposed to FITC- $\sigma^{54}$  peptides.**

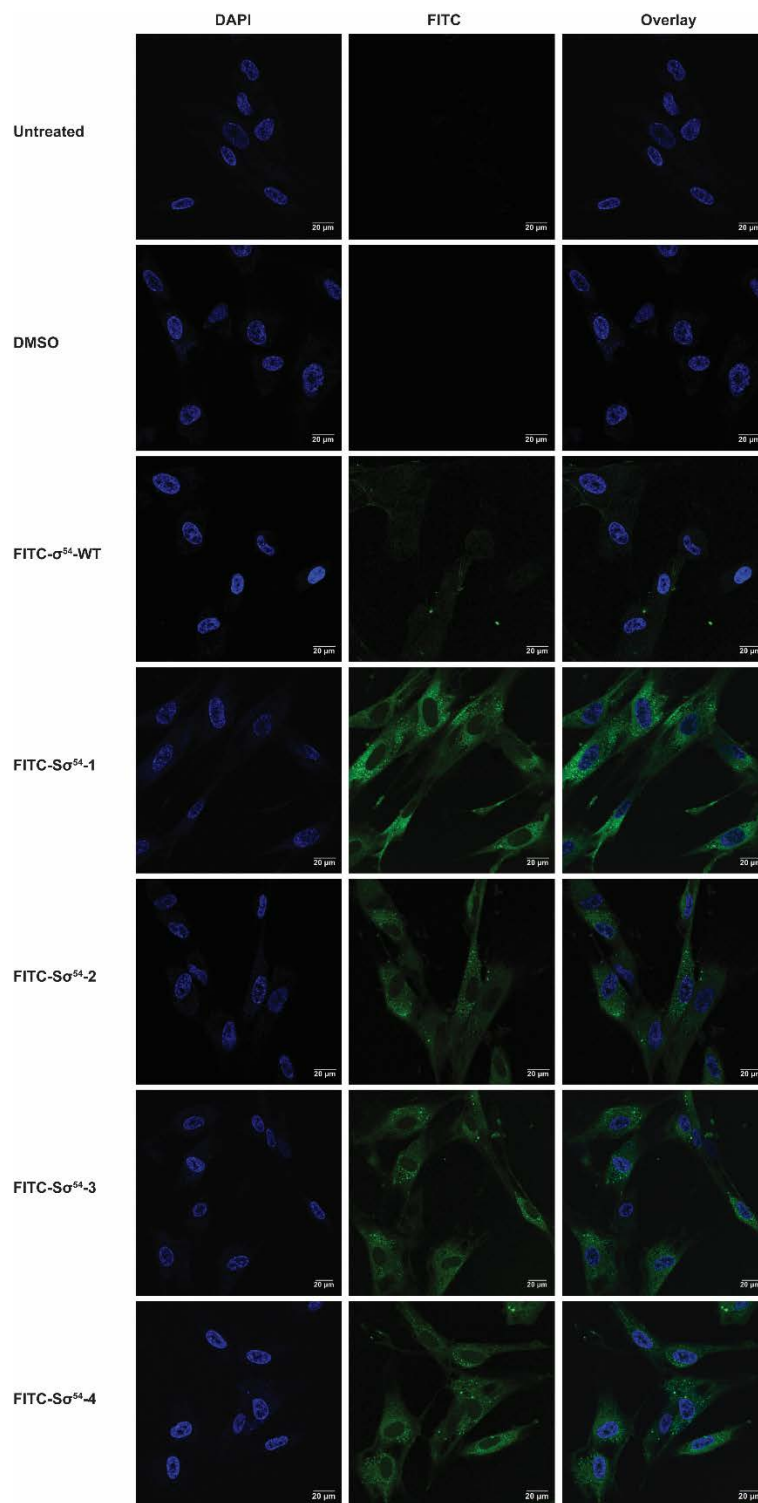

**Supplemental Figure S3, related to STAR methods.** Confocal fluorescence microscopy of WS1 fibroblasts treated with FITC- $\sigma^{54}$  peptides. Scale bars represent 20  $\mu\text{m}$ .

**Supplemental Figure S4. Gene set enrichment analysis plots.**

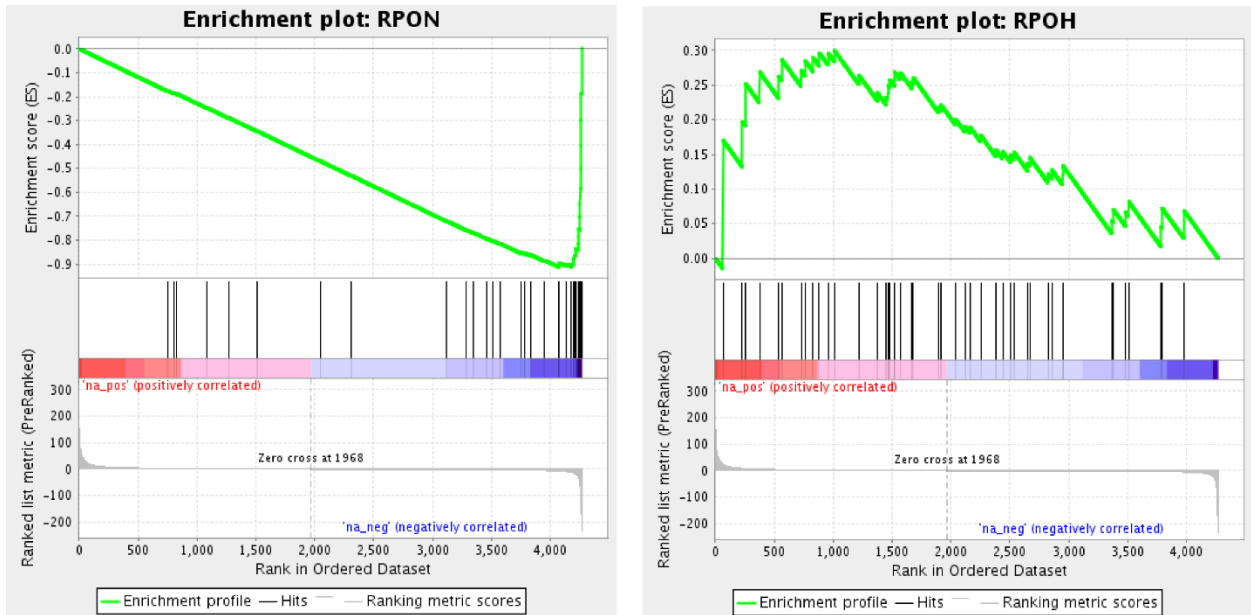

**Supplemental Figure S4. Gene set enrichment plots, related to main figure 4C and STAR Methods.. (left) RpoN regulon, (right) RpoH regulon.**

## Supplemental Tables

**Supplemental Table S1. Characterization of peptides used in this study. Related to Figure 1.**

| Peptide                 | Sequence <sup>1</sup>                            | ESI calcd <sup>2</sup> | ESI found | t <sub>R</sub> <sup>3</sup> |
|-------------------------|--------------------------------------------------|------------------------|-----------|-----------------------------|
| Ac-WT $\sigma^{54}$     | Ac- $\beta$ Ala-FKVARRTVAKYREML-NH <sub>2</sub>  | 990.5                  | 990.9     | 8.25 min                    |
| Ac-S $\sigma^{54}$ -1   | Ac- $\beta$ Ala-FKVARRTZAKYREBX-NH <sub>2</sub>  | 1021.6                 | 1021.7    | 12.09 min                   |
| Ac-S $\sigma^{54}$ -2   | Ac- $\beta$ Ala-FKVXRRTXAKYREBL-NH <sub>2</sub>  | 1021.6                 | 1021.9    | 12.62 min                   |
| Ac-S $\sigma^{54}$ -3   | Ac- $\beta$ Ala-ZKVARRTXAKYREBL-NH <sub>2</sub>  | 1004.6                 | 1004.6    | 12.14 min                   |
| Ac-S $\sigma^{54}$ -4   | Ac- $\beta$ Ala-XKVAXRTVAKYREBL-NH <sub>2</sub>  | 955.0                  | 955.4     | 13.88 min                   |
| Ac-S $\sigma^{54}$ -scr | Ac- $\beta$ Ala-RVLXEFKXRBRTARYK-NH <sub>2</sub> | 1021.6                 | 1022.0    | 10.06 min                   |

<sup>1</sup> Non-proteogenic amino acids: B = norleucine, Z = (R)-2-(7'-octenyl)-alanine, X = (S)-2-(4'-pentenyl)-alanine.

<sup>2</sup> ESI/MS calculated and found for  $([M+2H]/2)^+$ .

<sup>3</sup> C-18 reverse phase HPLC retention time (t<sub>R</sub>) for peptides run on a 40-minute gradient of 15-95% acetonitrile/water with 0.1% formic acid.

**Supplemental Table S2. DNA oligos and primers used in this study. Related to Figure 2 and Figure 4.**

| Name                                       | Sequence (5' -> 3')                      |
|--------------------------------------------|------------------------------------------|
| FITC <i>glnAP2</i> 30mer Forward           | /5FluorT/AGTTGGCACAGATTTTCGCTTTATCTTTTTT |
| FITC <i>glnAP2</i> 30mer Reverse           | /5FluorT/AAAAAAGATAAAGCGAAATCTGTGCCAACT  |
| FITC <i>glnAP2</i> 30mer-scrambled Forward | /5FluorT/GTGCTATTATTCCGTTATCGTTGTTACTAT  |
| FITC <i>glnAP2</i> 30mer-scrambled Reverse | /5FluorT/ATAGTAACAACGATAACGGAATAATAGCAC  |
|                                            |                                          |
| 6FAM- <i>glnAp2</i> 218mer TOP             | /56-FAM/AGCGCAAATCAACAACTTCACTTCGTG      |
| 6FAM- <i>glnAp2</i> 218mer BOTTOM          | /56-FAM/AGCCCTTTTGCACGATGGTGC            |
|                                            |                                          |
| <i>glnAp2</i> 218mer TOP                   | AGCGCAAATCAACAACTTCACTTCGTG              |
| <i>glnAp2</i> 218mer BOTTOM                | AGCCCTTTTGCACGATGGTGC                    |
|                                            |                                          |
| <i>cysG</i> 3 Forward                      | ATTCCGTTCTCGGTGGTTCC                     |
| <i>cysG</i> 3 Reverse                      | CCAGCGTCTGTTTTCTGCC                      |
| <i>yeaG</i> 1 Forward                      | AGGTCTGGCCGTCAATTCTG                     |
| <i>yeaG</i> 1 Reverse                      | CATTCTGCGCGTAGTGTTCCG                    |
| <i>pspA</i> 10 Forward                     | GCAGGAAAAAGCCGAACTGG                     |
| <i>pspA</i> 10 Reverse                     | CTTTCTTCATGCGTGCCAGC                     |
| <i>nac</i> 3 Forward                       | CTGGATACACCAGCCACAGG                     |
| <i>nac</i> 3 Reverse                       | GGCATTATCGGGGCAAGTCT                     |
| <i>glnA</i> 4 Forward                      | TACGGATAGACGCAGAACGG                     |
| <i>glnA</i> 4 Reverse                      | AAACGTGAGTTCTGGGGGTG                     |
